# Supplementary material for: GATA6: A Pan-Cancer Transcription-Factor Biomarker Linking Diagnosis, Prognosis, and Anti- Tumour Immunity
Source: Research Square preprint supplement (doi:10.21203/rs.3.rs-8150629/v1), 2025-12-15
Supplement: Supplementary file 1 [file c1158d5f5f67c81a74aea6bf.docx]

Supplementary Fig1. (a) The AUC values of seven tumour types, including BLCA, CESC, CHOL, KICH, LUAD, PCPG, and UCEC.

Supplementary Fig2. (a) The AUC values of elven tumour types.

Supplementary Fig3.(a) Age-stratified differential expression analysis of the GATA6 gene in CHOL, ESCA, LUAD, KIRP, ACC, and BLCA.

Supplementary Fig4.(a) Age-stratified differential expression analysis of the GATA6 gene in BLCA, CESC, COAD, KIRC, LUAD, PAAD, THCA, and UCS.

Supplementary Fig5.(a) Cox regression of GATA6 CNV vs. OS across cancers.(b)Association between GATA6 gene-set copy number variation (CNV) and survival differences across diverse cancer types.

Supplementary Fig6.(a) Relationship between GATA6 DNA methylation level and patient survival.

Supplementary Figure7.(a) ZFPM2, ZFPM1, and HEY2 showed the strongest correlation with GATA6.

Supplementary Fig8.(a) GO analysis indicated GATA6's involvement in external and extracellular matrix organization and humoral immune response, significantly correlating with its expression. (b) KEGG pathway analysis highlighted GATA6's Involvement in Autoimmune Thyroid Disease, S. aureus Infections, Hematopoietic Lineages, and ECM Interactions .

Supplementary Fig9.(ab) The impact of GATA6 mRNA expression on drug response.
